# Supplementary material for: Larval Zebrafish Exhibit Collective Circulation in Confined Spaces
Source: Frontiers journal article supplement (doi:10.3389/fphy.2021.678600), 2021-09-24
Supplement: Table_1.docx [file Table_1.docx]

**Supplemental Table 1: Components for custom-built behavioral recording setup.**

| *Item* | *Model #* |
| --- | --- |
| Computer | Dell Precision 5820 Tower |
| High-Speed Camera | Mikrotron EoSens CL MC1362 |
| Lens | Fujinon HF35SA-1 ⅔” 35mm F1.4 Manual Iris C-Mount Lens |
| Frame Grabber Drop-In Card | National Instruments PCIe-1433 |
| Bandpass filter | Midwest Optical BP850-49 from Graftek Imaging |
| IR LEDs | Infrared 850 nm IR LED Strip Light flexible strips connected with PN 3071 solderless connectors, all from Waveform Lighting |
| Cold mirror | Knight Optical 700FCQ160100 |
| Aluminum breadboard | Thorlabs MB4575/M |
| Rail | Thorlabs XT95-500 - 95 mm Construction Rail |
| Rail Baseplate | Thorlabs XT95P3 |
| Rail Mount | Thorlabs XT95P12/M |
